# Supplementary material for: A Qualitative Risk Assessment for Bluetongue Disease and African Horse Sickness: The Risk of Entry and Exposure at a UK Zoo
Source: MDPI journal article supplement (doi:10.3390/v14030502), 2022-02-28
Supplement: s1 [file s1]

**Supplementary Table S3: Imported equids from non-EU countries from January 2018-December 2019.** An additional 16,307 horses, 44 donkeys and 29 mules were imported from EU countries from January 2018-July 2020 [97].

| Country of Origin    | 2018 (No. of Horses) | 2019 (No. of Horses) |
|----------------------|----------------------|----------------------|
| Argentina            | 423                  | 430                  |
| Australia            | 93                   | 124                  |
| Bahrain              | 24                   | 35                   |
| Barbados             | 2                    | 0                    |
| Canada               | 35                   | 52                   |
| Chile                | 8                    | 4                    |
| China                | 14                   | 6                    |
| Hong Kong            | 41                   | 31                   |
| Iceland              | 5                    | 18                   |
| Indonesia            | 10                   | 0                    |
| Israel               | 2                    | 5                    |
| Japan                | 13                   | 18                   |
| Jordan               | 0                    | 6                    |
| Korea, Republic of   | 1                    | 2                    |
| Kuwait               | 8                    | 18                   |
| Malaysia             | 2                    | 6                    |
| Mauritius            | 142                  | 87                   |
| Morocco              | 16                   | 45                   |
| New Zealand          | 27                   | 34                   |
| Oman                 | 43                   | 50                   |
| Peru                 | 0                    | 6                    |
| Qatar                | 35                   | 37                   |
| Russian Federation   | 47                   | 21                   |
| Saudi Arabia         | 3                    | 16                   |
| Serbia               | 0                    | 1                    |
| Singapore            | 3                    | 9                    |
| Thailand             | 1                    | 5                    |
| Tunisia              | 0                    | 7                    |
| Turkey               | 0                    | 3                    |
| Ukraine              | 4                    | 17                   |
| United Arab Emirates | 484                  | 600                  |
| United States        | 559                  | 498                  |
| Uruguay              | 16                   | 2                    |
| <b>Total</b>         | <b>2061</b>          | <b>2193</b>          |
