# Supplementary material for: A Qualitative Risk Assessment for Bluetongue Disease and African Horse Sickness: The Risk of Entry and Exposure at a UK Zoo
Source: MDPI journal article supplement (doi:10.3390/v14030502), 2022-02-28
Supplement: s1 [file s1]

**Supplementary Table S1: Imports of animals to ZSL London Zoo from outside of the UK (including Jersey). From January 2017-December 2019 [69].**

| Country        | City      | Animal Common Name                            | Animal Scientific Name             | No. of Animals | Date of import |
|----------------|-----------|-----------------------------------------------|------------------------------------|----------------|----------------|
| Austria        | Vienna    | Charco Palma pupfish                          | <i>Cyprinodon veronicae</i>        | 1              | 14/12/2017     |
|                |           | Killifish                                     | <i>Aphanius saldae</i>             | 1              | 14/12/2017     |
|                |           | La Palma Pupfish, Cachorrito de Charco Palmal | <i>Cyprinodon longidorsalis</i>    | 1              | 14/12/2017     |
|                |           | Potosi pupfish                                | <i>Cyprinodon alvarezi</i>         | 1              | 14/12/2017     |
|                |           |                                               |                                    |                |                |
| Canada         | Toronto   | Big-headed turtle                             | <i>Platystemon megacephalum</i>    | 4              | 25/09/2018     |
|                |           | Malagasy cichlid                              | <i>Ptychochromis insolitus</i>     | 3              | 03/10/2019     |
|                |           | Panchax                                       | <i>Panchypanchax amoulti</i>       | 1              | 03/10/2019     |
|                |           | Zonobe rainbowfish                            | <i>Rheocles vatosoa</i>            | 1              | 03/10/2019     |
| Czech Republic | Praha     | Moholi bushbaby                               | <i>Galago moholi</i>               | 1              | 12/04/2017     |
|                | Olomouc   | Southern tamandua                             | <i>Tamandua tetradactyla</i>       | 1              | 07/09/2017     |
| Denmark        | Ebeltoft  | Sumatran tiger                                | <i>Panthera tigris sumatrae</i>    | 1              | 28/01/2019     |
| France         | Lille Zo  | Grey parrot                                   | <i>Psittacus erithacus</i>         | 4              | 24/01/2018     |
| Germany        | Hamburg   | Dwarf mongoose                                | <i>Helogale parvula undulatus</i>  | 2              | 19/09/2017     |
|                | Frankfurt | Grey slender loris                            | <i>Loris lydekkerianus grandis</i> | 1              | 24/01/2018     |
|                | Koln      | Abdim's stork                                 | <i>Ciconia abdimii</i>             | 1              | 26/06/2018     |
| Netherlands    | Rotterdam | Hyacinth macaw                                | <i>Anodorhynchus hyacinthinus</i>  | 1              | 28/07/2018     |
| Switzerland    | Zurich    | Galapagos tortoise                            | <i>Chelonoidis nigra</i>           | 8              | 28/02/2017     |
|                |           | Panther chameleon                             | <i>Furcifer pardalis</i>           | 2              | 19/12/2019     |
| UK             | Jersey    | Round Island skink                            | <i>Leiopisma telfarii</i>          | 16             | 21/07/2017     |
|                |           | Giant jumping rat                             | <i>Hypogeomys antimena</i>         | 1              | 19/12/2018     |
