# Supplementary material for: A Qualitative Risk Assessment for Bluetongue Disease and African Horse Sickness: The Risk of Entry and Exposure at a UK Zoo
Source: MDPI journal article supplement (doi:10.3390/v14030502), 2022-02-28
Supplement: s1 [file s1]

**Supplementary Table S2: Ruminant imports from EU countries January 2018-July 2020.** No imports occurred from non-EU countries in these years [97]. Countries and years with reported BTV circulation are marked in red.

| Country        | Species                | 2018 (No. of animals) | 2019 (No. of animals) | 2020 (No. of animals) |
|----------------|------------------------|-----------------------|-----------------------|-----------------------|
| Austria        | <i>Bos taurus</i>      | 74                    | 0                     | 0                     |
| Belgium        | <i>Bos taurus</i>      | 957                   | 1621                  | 33                    |
| Czech Republic | <i>Bos spp</i>         | 1                     | 0                     | 0                     |
|                | <i>Bos taurus</i>      | 0                     | 1                     | 0                     |
| Denmark        | <i>Bos taurus</i>      | 2962                  | 3858                  | 0                     |
| France         | <i>Bos taurus</i>      | 1228                  | 230                   | 18                    |
| Germany        | <i>Bos spp</i>         | 2                     | 0                     | 0                     |
|                | <i>Bos taurus</i>      | 4683                  | 6019                  | 32                    |
| Ireland        | <i>Bison spp</i>       | 0                     | 2                     | 0                     |
|                | <i>Bos taurus</i>      | 29838                 | 38930                 | 6                     |
| Italy          | <i>Bos taurus</i>      | 11                    | 4                     | 0                     |
|                | <i>Bubalus bubalis</i> | 48                    | 25                    | 0                     |
| Luxembourg     | <i>Bos taurus</i>      | 601                   | 629                   | 0                     |
| Norway         | <i>Bos taurus</i>      | 0                     | 8                     | 0                     |
| Poland         | <i>Bos taurus</i>      | 0                     | 1                     | 0                     |
| Spain          | <i>Bos taurus</i>      | 6                     | 0                     | 0                     |
| Sweden         | <i>Bos taurus</i>      | 140                   | 349                   | 0                     |
| Netherlands    | <i>Bos taurus</i>      | 7810                  | 2394                  | 0                     |
| <b>Total</b>   |                        | <b>48355</b>          | <b>54071</b>          | <b>89</b>             |
